# Supplementary material for: Optimized Operating Conditions for a Biological Treatment Process of Industrial Residual Process Brine Using a Halophilic Mixed Culture
Source: MDPI journal article supplement (doi:10.3390/fermentation8060246), 2022-05-25
Supplement: s1 [file s1]

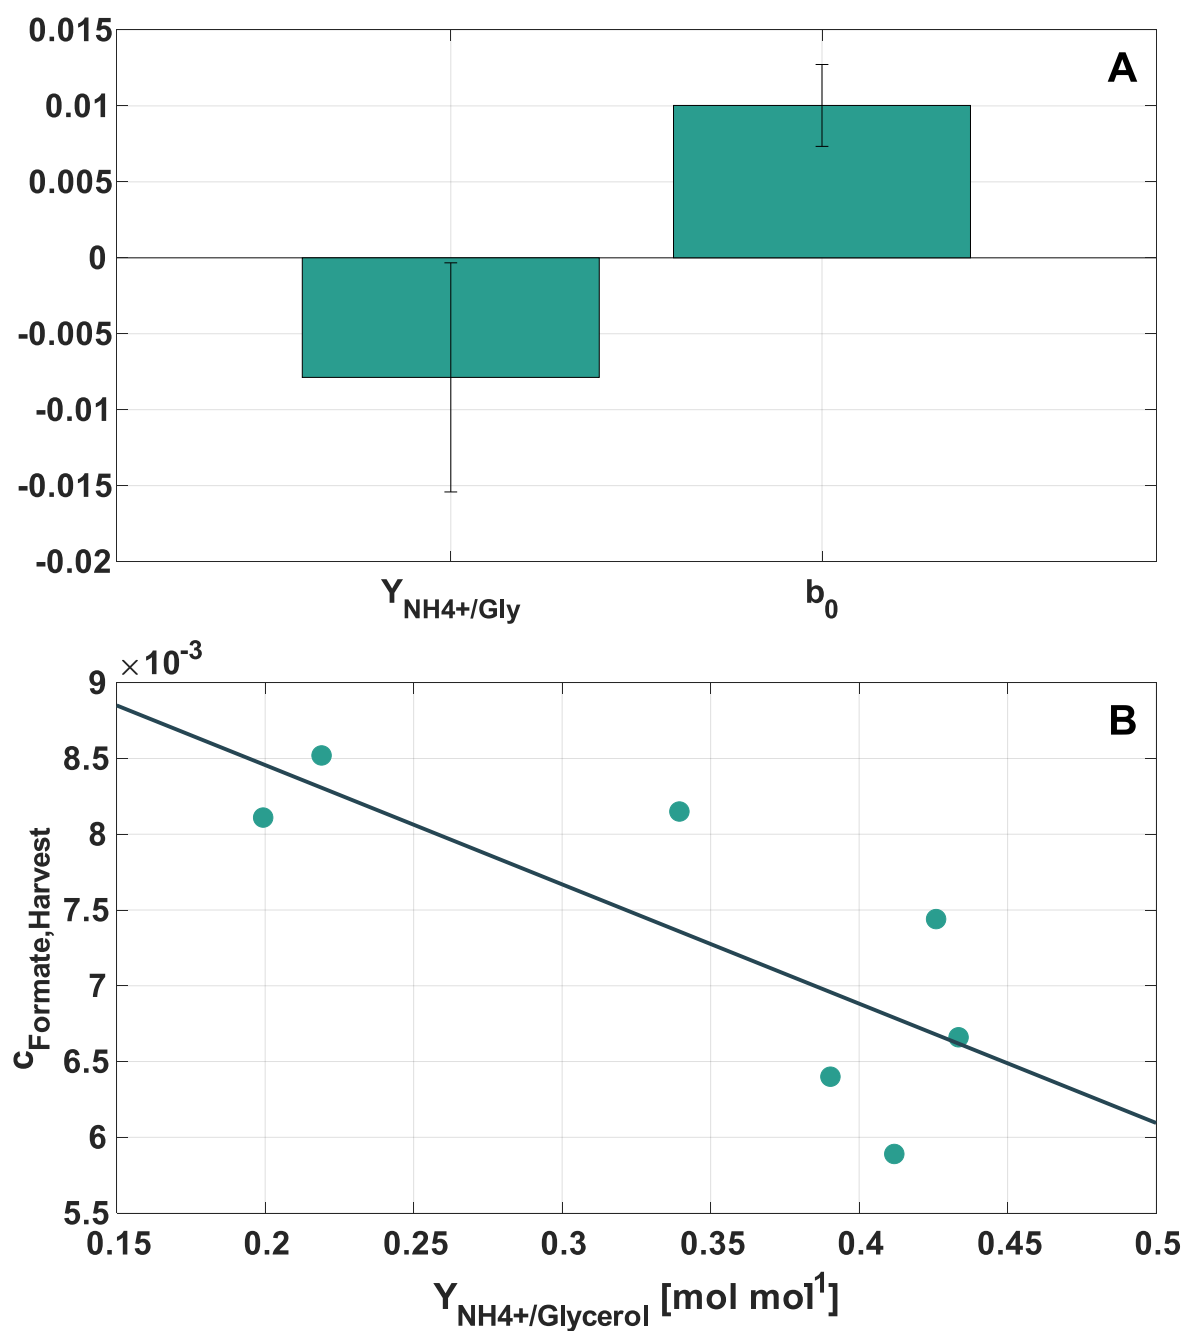

**Figure S1. Results of linear regression with  $Y_{NH4+/glycerol}$  as predictor variable and  $c(formate_{Harvest})$  as target variable.** A) Regression coefficients for  $Y_{NH4+/glycerol}$  and  $\beta_0$  with error bars indicating the 95% significance interval. B)  $\bullet$ :  $Y_{NH4+/glycerol}$ ; —: fitted linear regression model.
