# Supplementary material for: Optimized Operating Conditions for a Biological Treatment Process of Industrial Residual Process Brine Using a Halophilic Mixed Culture
Source: MDPI journal article supplement (doi:10.3390/fermentation8060246), 2022-05-25
Supplement: s1 [file s1]

Archive with 1 entries (1 files):
- fermentation-1727232-supplementary.pdf
